# Supplementary material for: Bulked Target Capture Sequencing Identified Numerous Genetic Loci Associated with Alfalfa Growth Vigor During Inbreeding
Source: Preprints.org preprint supplement (doi:10.20944/preprints202305.0898.v1), 2023-05-12
Supplement: Supplementary file 1 [file supplementary]

**Supplementary Information**

**Table S1** Information for the reads, read depth, variants and indels

| Information                                          | Total         |
|------------------------------------------------------|---------------|
| Sequence used for exome capture probe design         | 112,626       |
| Total Number of Samples                              | 121           |
| Read length                                          | 2 x 150 bp    |
| Total reads for all samples                          | 4,267,734,316 |
| Average reads per sample                             | 35,270,531    |
| Average read depth per sample                        | 9.564         |
| Raw variant Number                                   | 13,474,028    |
| Total SNPs                                           | 11,216,753    |
| Total Insertions                                     | 1,652,481     |
| Total Deletions                                      | 597,883       |
| Total SNPs after filtering (within and outside gene) | 591,919       |
| Total SNPs within genes                              | 313,985       |

9 **Table S2** Individual heterozygosity of plants from different location, generation and health

| Location   | Health                          | Generation     | Individual/<br>pool | N  | Average | Std   | Max   | Min   |
|------------|---------------------------------|----------------|---------------------|----|---------|-------|-------|-------|
| Washington | Strong                          | S <sub>1</sub> | pool                | 3  | 0.611   | 0.065 | 0.682 | 0.555 |
|            |                                 | S <sub>2</sub> | individual          | 9  | 0.389   | 0.040 | 0.463 | 0.333 |
|            | Weak                            | S <sub>1</sub> | pool                | 3  | 0.515   | 0.031 | 0.549 | 0.486 |
|            |                                 | S <sub>2</sub> | individual          | 9  | 0.348   | 0.053 | 0.417 | 0.248 |
| Utah       | Strong                          | S <sub>1</sub> | pool                | 2  | 0.541   | 0.141 | 0.642 | 0.441 |
|            |                                 | S <sub>2</sub> | pool                | 11 | 0.362   | 0.086 | 0.468 | 0.196 |
|            | Weak                            | S <sub>1</sub> | pool                | 2  | 0.419   | 0.007 | 0.425 | 0.414 |
|            |                                 | S <sub>2</sub> | pool                | 12 | 0.519   | 0.065 | 0.608 | 0.433 |
| Wisconsin  | Parental<br>clone               | S <sub>0</sub> | individual          | 5  | 0.417   | 0.056 | 0.481 | 0.362 |
|            | Strong                          | S <sub>1</sub> | individual          | 56 | 0.316   | 0.089 | 0.486 | 0.115 |
|            | Top,<br>low and<br>No<br>Seeded | S <sub>2</sub> | pool                | 9  | 0.373   | 0.095 | 0.492 | 0.203 |

10  
11  
12  
13  
14  
15  
16  
17  
18  
19

20 **Table S3** Summary statistics from GWAS result using FarmCPU with 588,136 SNPs.

| Chromosome | Position | P.value  | MAF    | Effect | SNP         | PAE(%) |
|------------|----------|----------|--------|--------|-------------|--------|
| 6          | 41916109 | 6.54E-20 | 0.1446 | 0.352  | S6_41916109 | 8.556  |
| 8          | 68992917 | 2.02E-19 | 0.1529 | 0.296  | S8_68992917 | 4.831  |
| 1          | 23794794 | 1.98E-16 | 0.0744 | -0.319 | S1_23794794 | 5.304  |
| 4          | 53208128 | 3.55E-12 | 0.0537 | -0.242 | S4_53208128 | 3.494  |
| 8          | 87604023 | 1.35E-11 | 0.0826 | -0.208 | S8_87604023 | 4.511  |
| 5          | 80794484 | 3.13E-11 | 0.0868 | -0.216 | S5_80794484 | 6.017  |
| 7          | 82129849 | 3.81E-11 | 0.0620 | -0.211 | S7_82129849 | 2.445  |
| 7          | 22499070 | 8.43E-11 | 0.0537 | -0.274 | S7_22499070 | 9.740  |
| 3          | 2154144  | 2.04E-10 | 0.1157 | 0.171  | S3_2154144  | 1.026  |
| 7          | 31387748 | 1.69E-08 | 0.1116 | 0.150  | S7_31387748 | 1.793  |
| 6          | 24909781 | 3.57E-08 | 0.0868 | -0.228 | S6_24909781 | 2.667  |

21  
22 PAE - Phenotypic Variation Explained  
23 MAF - Minor Allele Frequency  
24 SNP - Single Nucleotide Polymorphism

25  
26  
27  
28  
29  
30  
31  
32  
33

**Table S4** MAF of individual strong and weak group as well as pooled strong and weak groups over significant SNPs.

| CHR | POS      | IND   | IND<br>Strong | IND<br>Weak | Pooled | Pooled<br>Strong | Pooled<br>Weak |
|-----|----------|-------|---------------|-------------|--------|------------------|----------------|
| 6   | 41916109 | 0.031 | 0.021         | 0.111       | 0.154  | 0.045            | 0.275          |
| 8   | 68992917 | 0.088 | 0.092         | 0.055       | 0.166  | 0.181            | 0.050          |
| 1   | 23794794 | 0.025 | 0.014         | 0.111       | 0.107  | 0.045            | 0.175          |
| 4   | 53208128 | 0.044 | 0.014         | 0.277       | 0.166  | 0.136            | 0.200          |
| 8   | 87604023 | 0.013 | 0.007         | 0.055       | 0.226  | 0.159            | 0.300          |
| 5   | 80794484 | 0.088 | 0.079         | 0.166       | 0.250  | 0.227            | 0.125          |
| 7   | 82129849 | 0.013 | 0.014         | 0.001       | 0.130  | 0.023            | 0.250          |
| 7   | 22499070 | 0.056 | 0.064         | 0.001       | 0.214  | 0.227            | 0.150          |
| 3   | 2154144  | 0.025 | 0.014         | 0.111       | 0.130  | 0.136            | 0.125          |
| 7   | 31387748 | 0.063 | 0.064         | 0.055       | 0.321  | 0.272            | 0.225          |
| 6   | 24909781 | 0.056 | 0.036         | 0.222       | 0.130  | 0.090            | 0.175          |

CHR - Chromosomes

POS - Position

IND - Individual

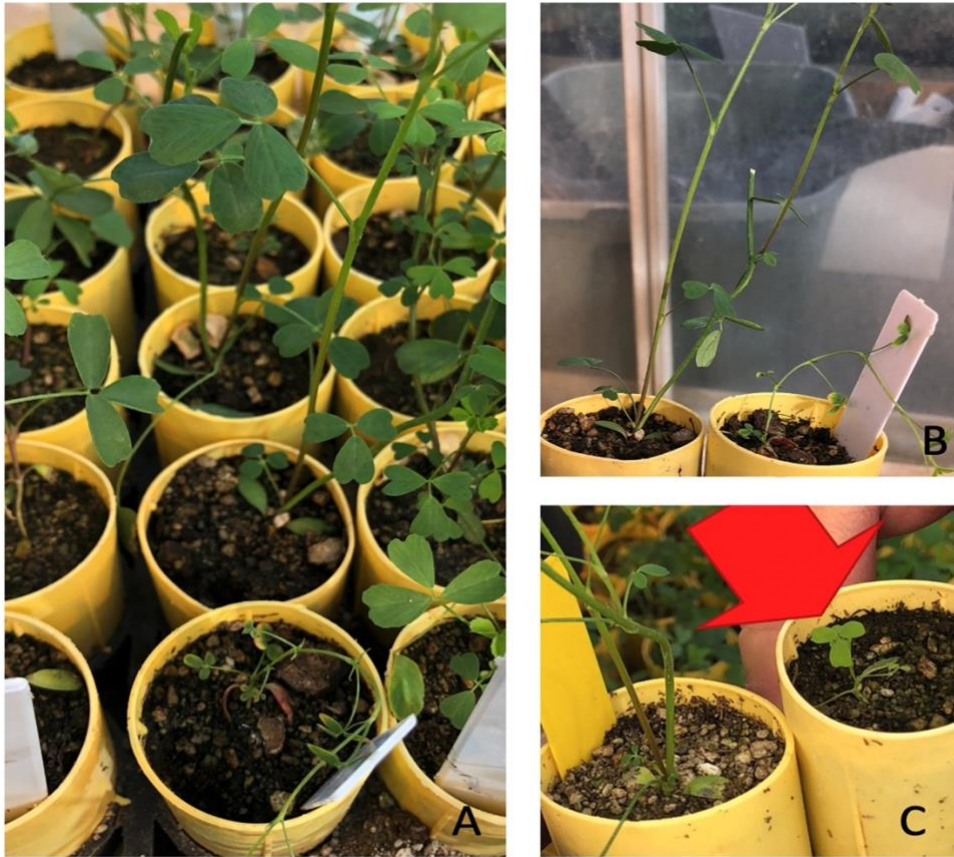

**Figure S1. Selection of pairs of strong and weak plants within self-pollinated inbred lines.** Six seeds were planted individually for each self-pollinated individual (A). The individual (the middle column) with a significantly deficient progeny was identified for sampling. The deficient progeny and the strongest progeny within the individual lines were sampled (B). The deficient plants must have sufficient leaves to extract DNA (C).

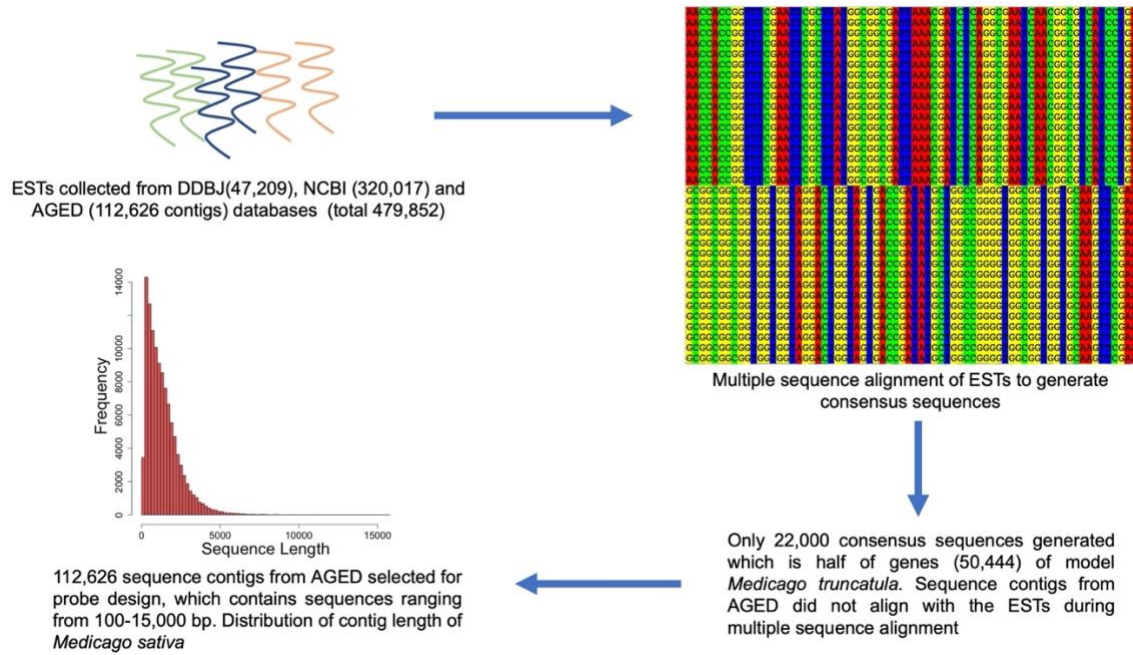

**Figure S2. Design of exome capture chips for genotyping alfalfa accession in this study.** DDBJ (DNA Data Bank of Japan), NCBI (National Center for Biotechnology Information), and AGED (Alfalfa Gene Index and Expression Database). ESTs are the Expressed Sequence Tags collected from three public databases.

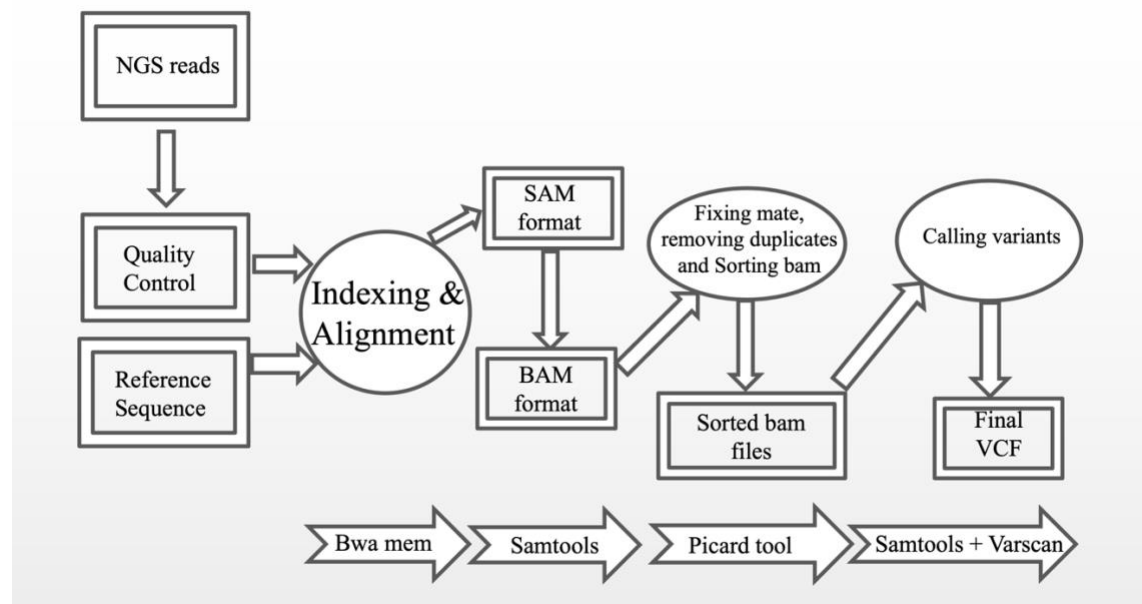

**Figure S3. SNP calling pipeline for exome capture sequencing.** The SNP calling pipeline is presented in the order it is performed. The bold arrow represents the workflow, and the circle and rectangular boxes represent the activities performed during the workflow. The gray arrow at the bottom with the arrow facing from left to right includes all the tools that were used to generate the respective results in the analysis.

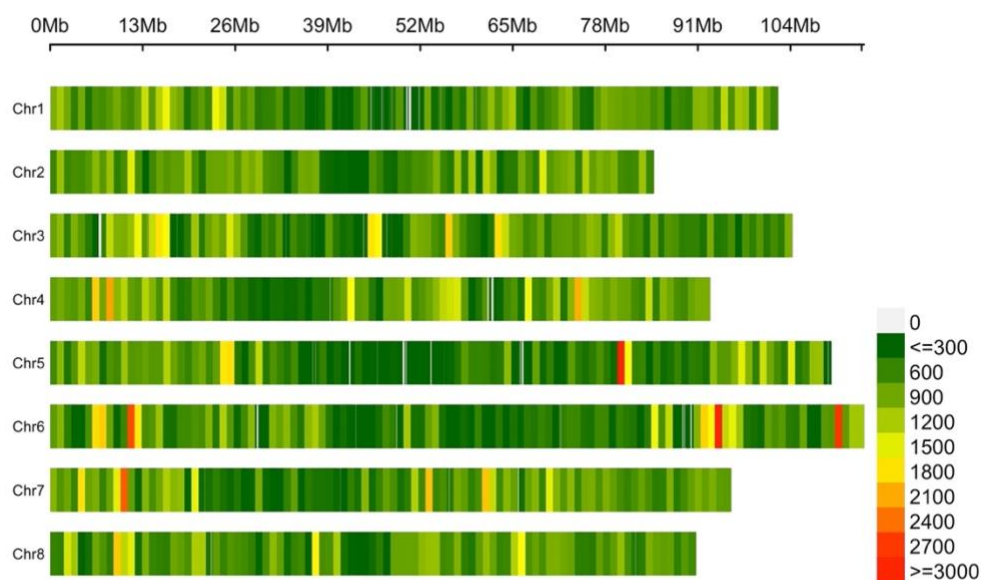

**Figure S4. Genome-wide distribution of SNPs on all the Chromosomes.** The horizontal axis shows the chromosome length while the colors within each tile represent SNPs density within a 1 Mb window size.

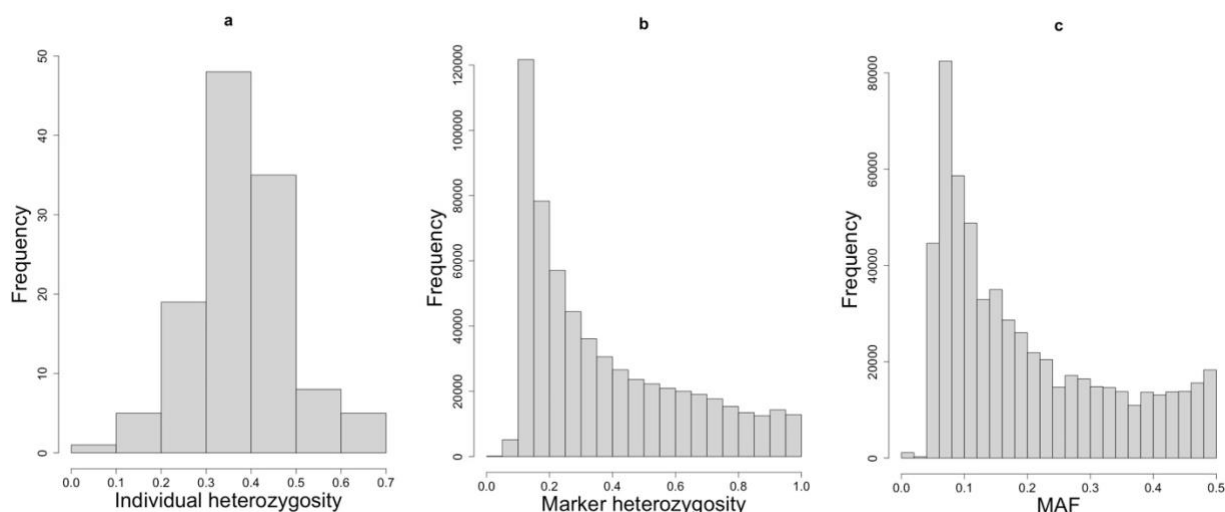

**Figure S5. The numbers of sequencing reads, read depth, and its distribution.** The total reads and average read depth shows increasing trends with an average of 30 million for total reads and around 9.5 for average read depth. The distribution of average sequencing depth shows most of the samples with an average depth of 8-12.



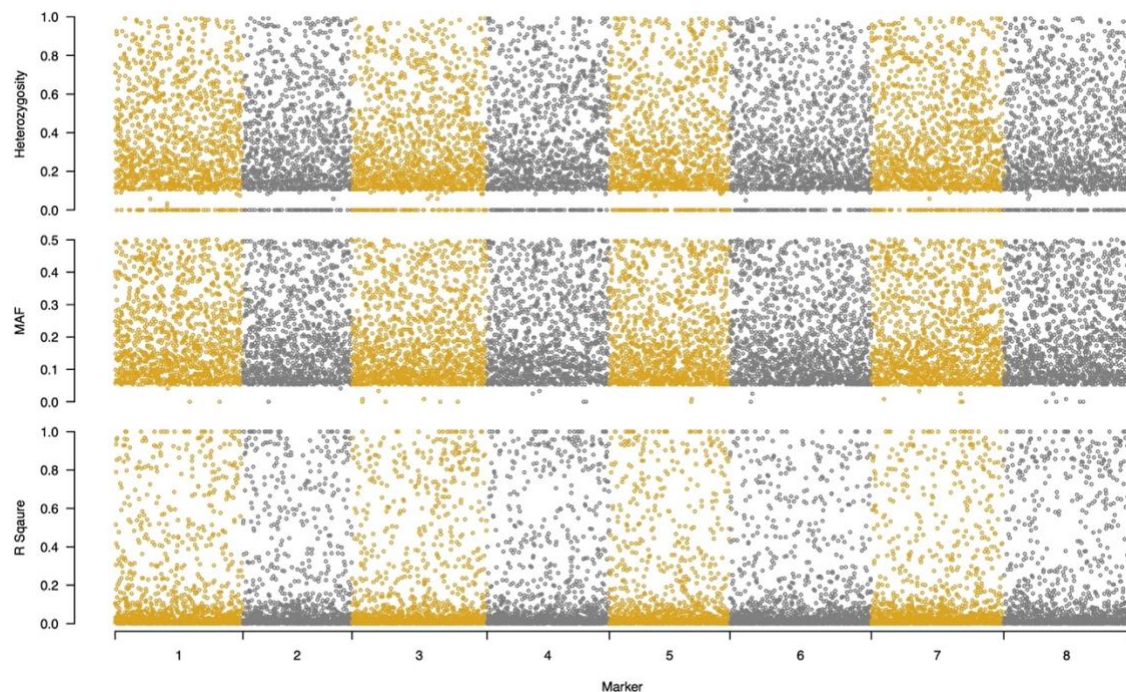

**Figure S6. Heterozygosity, minor allele frequency, and linkage disequilibrium across alfalfa genome.** The SNPs exhibit low heterozygosity across the genome. Each SNP is represented as a dot with heterozygosity as the vertical axis and genome position as the horizontal axis (a). Minor allele frequency (b) and linkage disequilibrium (c) are illustrated similarly. Linkage disequilibrium was calculated as the squared Pearson correlation coefficient between the adjacent SNPs.

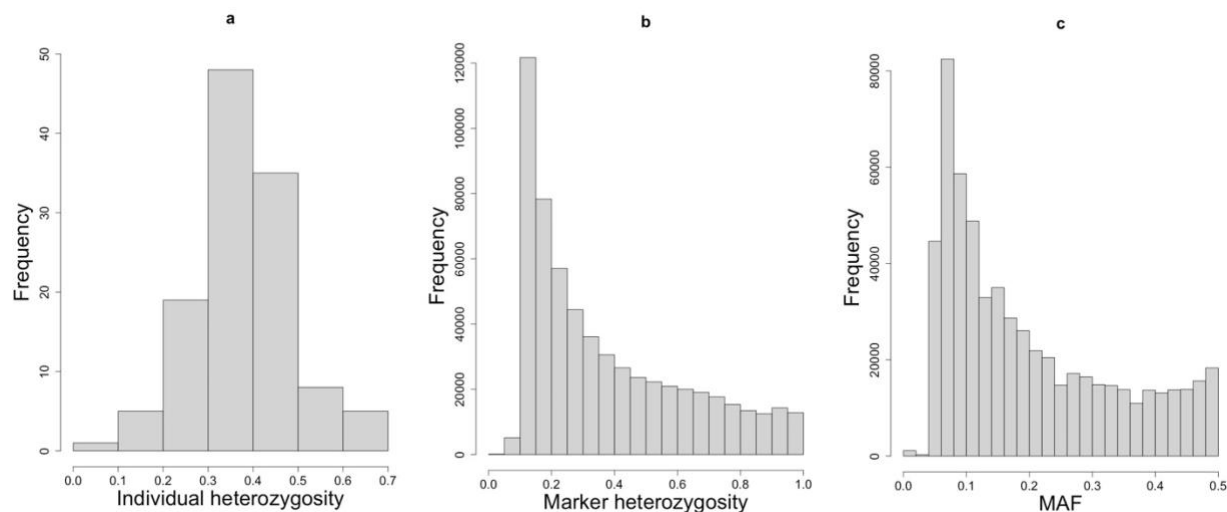

**Figure S7. Heterozygosity and minor allele frequency of single nucleotide polymorphisms (SNPs).** Heterozygosity was calculated for individual varieties (a) and markers (b). The MAF distribution is a skewed uniform distribution with more density on the 0 sides than on the 0.5 sides (c).
